# Supplementary material
Source: PubMed Central journal article supplement (PMC5105903)
Supplement: JB.00388-16_zjb999094251so1.pdf [file JB.00388-16_zjb999094251so1.pdf]

1 **APPENDIX**

2 **Uptake, metabolism and mode of action of the antibiotics roseoflavin and 8-**  
3 **demethyl-8-aminoriboflavin in *Listeria monocytogenes***

4 **Running title:** Flavin analogs as antibiotics

5 Andreas Matern<sup>1</sup>, Danielle Pedrolli<sup>2</sup>, Stephanie Großhennig<sup>1</sup>, Jörgen Johansson<sup>3</sup> and  
6 Matthias Mack<sup>1#</sup>

7 <sup>#</sup>Corresponding author.

8 <sup>1</sup>Department of Biotechnology, Institute for Technical Microbiology, Mannheim  
9 University of Applied Sciences, Mannheim, Germany

10 <sup>2</sup>Department of Bioprocess and Biotechnology, School of Pharmaceutical Sciences,  
11 Universidade Estadual Paulista (UNESP), Araraquara, Brazil

12 <sup>3</sup>Laboratory for Molecular Infection Medicine Sweden (MIMS), Department of  
13 Molecular Biology, Umeå University, Umeå, Sweden

14 **Correspondent footnote:**

15 Matthias Mack

16 Institute for Technical Microbiology

17 Mannheim University of Applied Sciences

18 Paul-Wittsack-Str. 10

19 68163 Mannheim, Germany

20 Tel.:+49-621-292-6496

21 Fax:+49-621-292-6420

22 E-mail: m.mack@hs-mannheim.de

23

24

25 **Figure legends of the appendix**

26 **Figures of the appendix:**

27 **1. Figure S1**

28 **2. Figure S2**

29 **3. Figure S3**

30 **4. Figure S4**

31 **5. Figure S5**

32 **References of the appendix**

- 33 1. **Mansjo M, Johansson J.** 2011. The riboflavin analog roseoflavin targets an  
34 FMN-riboswitch and blocks *Listeria monocytogenes* growth, but also  
35 stimulates virulence gene-expression and infection. *RNA Biol* **8**:674-680.
- 36 2. **Serrano A, Frago S, Velazquez-Campoy A, Medina M.** 2012. Role of key  
37 residues at the flavin mononucleotide (FMN):adenylyltransferase catalytic site  
38 of the bifunctional riboflavin kinase/flavin adenine dinucleotide (FAD)  
39 Synthetase from *Corynebacterium ammoniagenes*. *Int J Mol Sci* **13**:14492-  
40 14517.
- 41 3. **Serrano A, Frago S, Herguedas B, Martinez-Julvez M, Velazquez-**  
42 **Campoy A, Medina M.** 2013. Key residues at the riboflavin kinase catalytic  
43 site of the bifunctional riboflavin kinase/FMN adenylyltransferase from  
44 *Corynebacterium ammoniagenes*. *Cell Biochem Biophys* **65**:57-68.
- 45 4. **Frago S, Martinez-Julvez M, Serrano A, Medina M.** 2008. Structural  
46 analysis of FAD synthetase from *Corynebacterium ammoniagenes*. *BMC*  
47 *Microbiol* **8**:160.

48  
49  
50

51 **Figure legends of the appendix**

52 **Supplementary Fig. S1: Phosphorylation and adenylation of riboflavin,**  
53 **roseoflavin and 8-demethyl-8-aminoriboflavin.** The enzymatic conversion of  
54 riboflavin (top) to flavin mononucleotide (FMN) and flavin adenine dinucleotide  
55 (FAD), of roseoflavin (middle) to roseoflavin mononucleotide (RoFMN) and  
56 roseoflavin adenine dinucleotide (RoFAD) and of 8-demethyl-8-aminoriboflavin  
57 (bottom) to 8-demethyl-8-aminoriboflavin mononucleotide (AFMN) and 8-demethyl-  
58 8-aminoriboflavin adenine dinucleotide (AFAD). The reactions are catalyzed by  
59 flavokinases (2.7.1.26) and/or FAD synthetases (2.7.7.2.).

60

61 **Supplementary Fig. S2: Sequence, proposed secondary structure i.e. expected**  
62 **transcriptional intermediate of the *Listeria monocytogenes* FMN riboswitch *Rli96***  
63 **in the presence of FMN.** *Rli96* controls synthesis of the *lmo1945* mRNA encoding  
64 the membrane-embedded riboflavin-binding subunit Lmo1945 (EcfS or RibU) of the  
65 energy-coupling factor (ECF) riboflavin uptake system. In the presence of FMN  
66 (FMN binds to the aptamer formed by P1-P6) a transcriptional terminator forms  
67 which prevents formation of the full-length *lmo1945* mRNA (1). The highlighted  
68 nucleotides (blue) are predicted to pair in the absence of FMN forming an anti-  
69 terminator loop, enabling transcription to proceed. The replacement of nucleotides  
70 G37/G38 by A37/A37 (highlighted in grey) generated an FMN riboswitch variant  
71 which did not cause transcription termination in the presence of FMN or RoFMN (1).

72

73 **Supplementary Fig. S3: Lmo1945 facilitates riboflavin (RF) uptake.** RF  
74 auxotrophic *Bacillus subtilis*  $\Delta ribU::Kan^r \Delta ribB::Erm^r$  cells expressing *lmo1945* from  
75 plasmid pHT01-*lmo1945* was grown in a minimal medium in the presence of  
76 indicated amounts of RF and IPTG (to stimulate expression of *lmo1945*) (left panel).

77 Growth was recorded at  $\lambda=600$  nm. As a control, strains were transformed with the  
78 empty expression vector pHT01 (right panel). At 10  $\mu\text{M}$  only the *lmo1945* expressing  
79 strain could grow. At 100  $\mu\text{M}$  RF also the control strain could grow indicating that RF  
80 is able to cross the cytoplasmic membrane in the absence of a flavin transporter.

81

82 **Supplementary Fig. S4: Lmo1945 facilitates roseoflavin (RoF) uptake.** Riboflavin  
83 (RF) prototrophic *Bacillus subtilis*  $\Delta\text{ribU}::\text{Kan}^r$  cells expressing *lmo1945* from  
84 plasmid pHT01-*lmo1945* were grown in a minimal medium in the presence of  
85 indicated amounts of RF and IPTG (to stimulate expression of *lmo1945*) (left panel).  
86 Growth was recorded at  $\lambda=600$  nm. As a control, strains were transformed with the  
87 empty expression vector pHT01 (right panel). At 100  $\mu\text{M}$  RoF growth of the *lmo1945*  
88 expressing strain was strongly reduced whereas the control strain grew to a higher cell  
89 density. At 50  $\mu\text{M}$  RoF a similar effect was observed. Together these findings  
90 suggested that Lmo1945 was responsible for RoF uptake.

91

92 **Supplementary Fig. S5: Multiple sequence alignment of representative primary**  
93 **structures of bifunctional bacterial flavokinases/FAD-synthetases.** UniProtKB  
94 accession numbers for proteins are as follows: Cam\_RibF, bifunctional  
95 flavokinase/FAD synthetase from *Corynebacterium ammoniagenes*, Q59263;  
96 Eco\_RibF, bifunctional flavokinase/FAD synthetase from *Escherichia coli*, P0AG40;  
97 Bsu\_RibC, bifunctional flavokinase/FAD synthetase from *Bacillus subtilis*, P54575;  
98 Sco\_RibC, bifunctional flavokinase/FAD synthetase from *Streptomyces coelicolor*,  
99 Q9Z530; Sdav\_RibC1, bifunctional flavokinase/FAD synthetase from *Streptomyces*  
100 *davawensis*, K4R340; Lmo\_RibC, bifunctional flavokinase/FAD synthetase from  
101 *Listeria monocytogenes*, Q8Y7F2; Lmo\_0728, monofunctional FAD synthetase from  
102 *L. monocytogenes*, Q8Y914. The amino acids highlighted in blue and green were

103 reported to be relevant for the flavokinase function, whereas amino acids highlighted  
104 in red were reported to be relevant for the FAD synthetase function (2-4). (2-4).  
105 Conserved domains are boxed.  
106

107 **Supplementary Figure S1:**

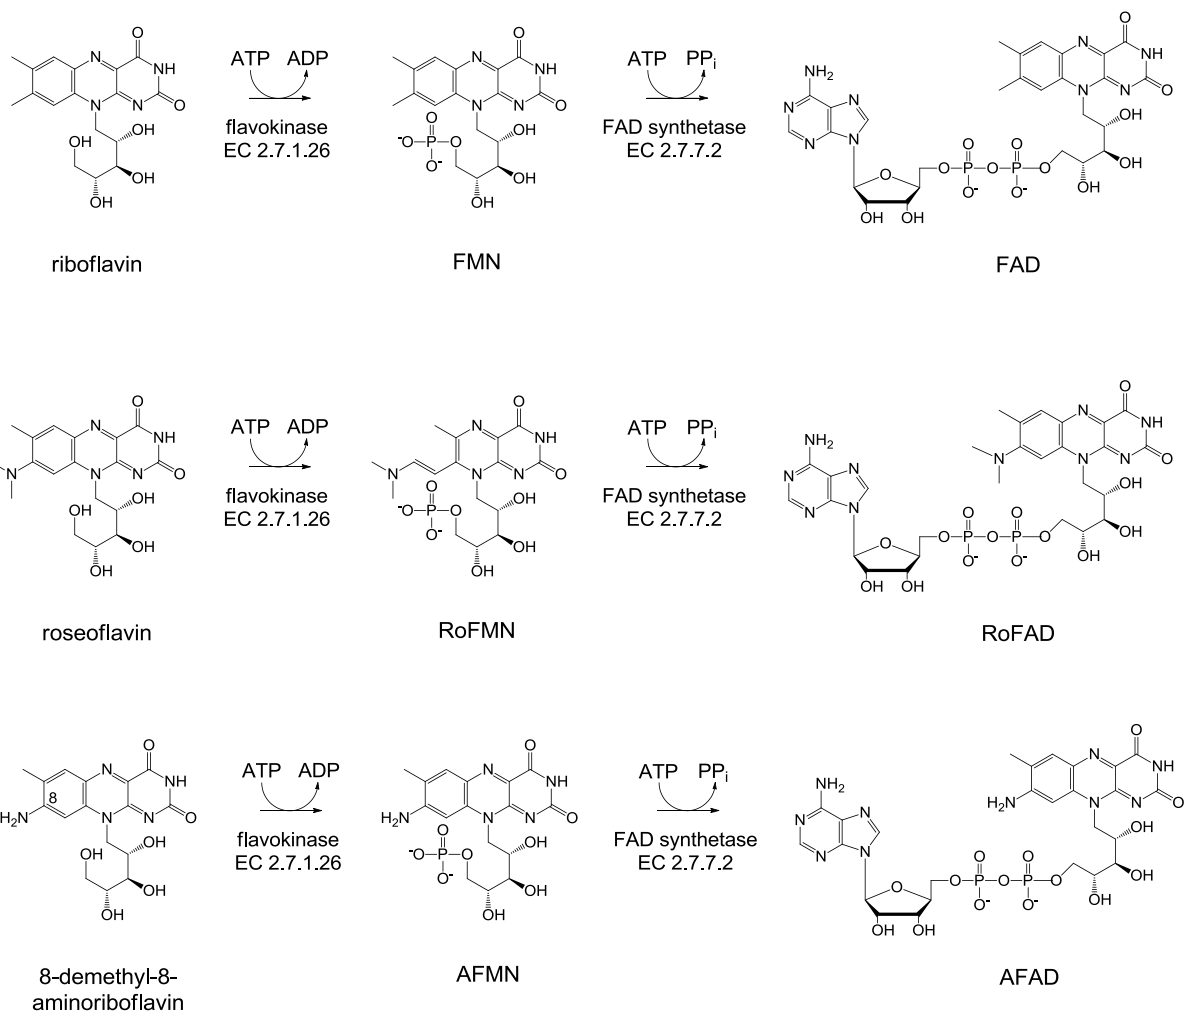

108

109 **Supplementary Figure S2:**

110

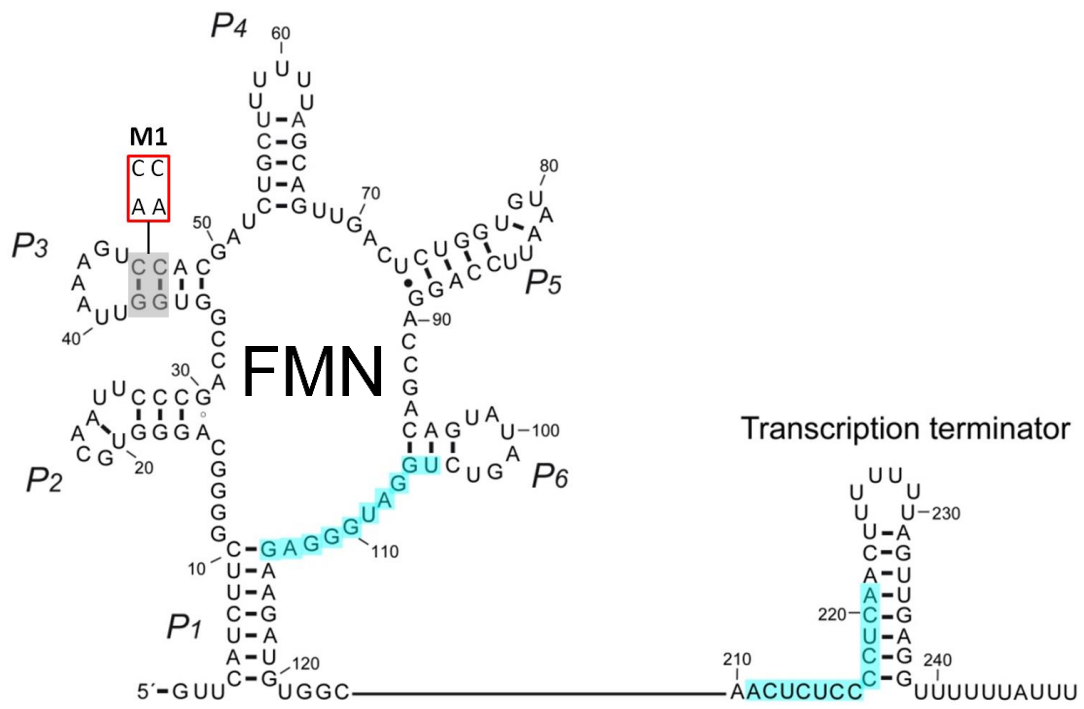

113 **Supplementary Figure S3:**

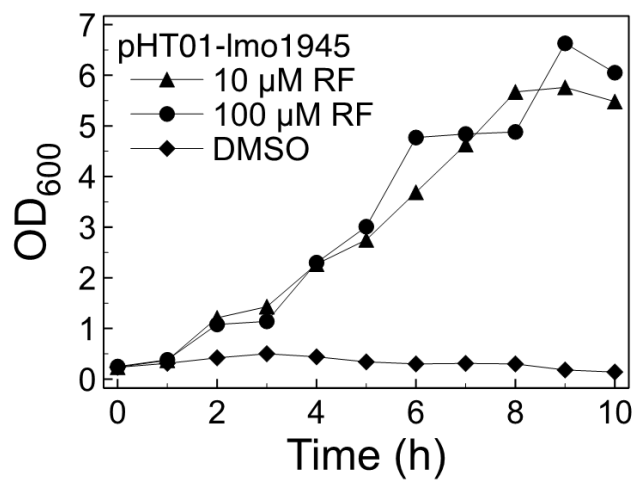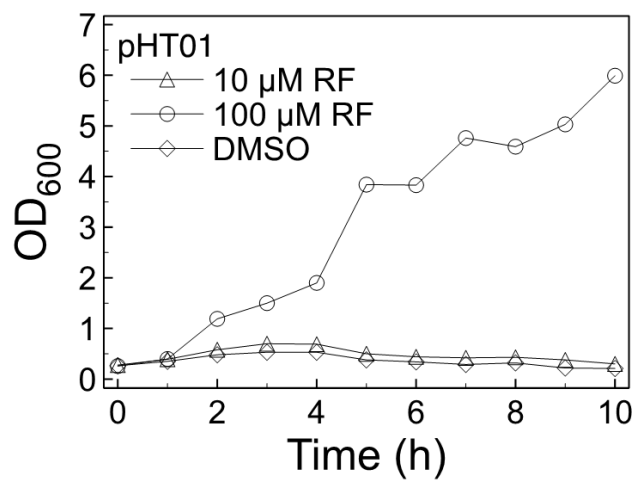

114



115 **Supplementary Figure S4:**

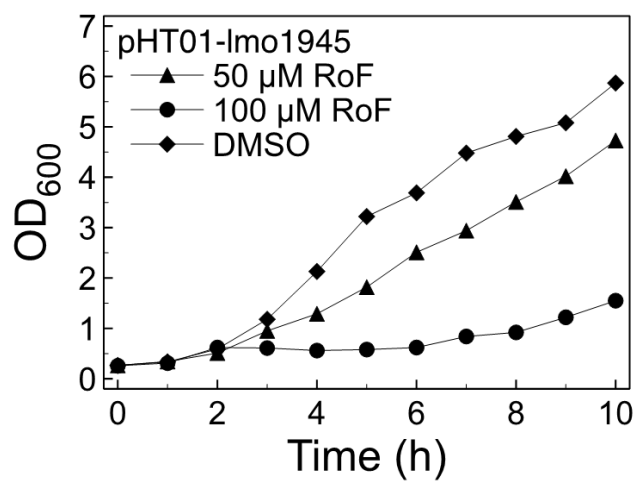

116

117

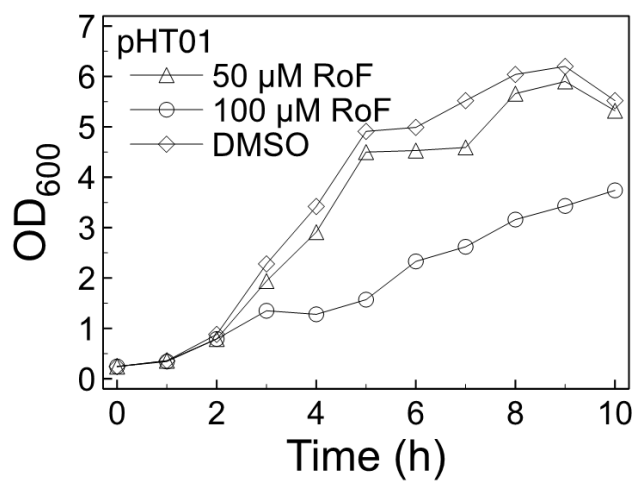

118 Supplementary Figure S5:

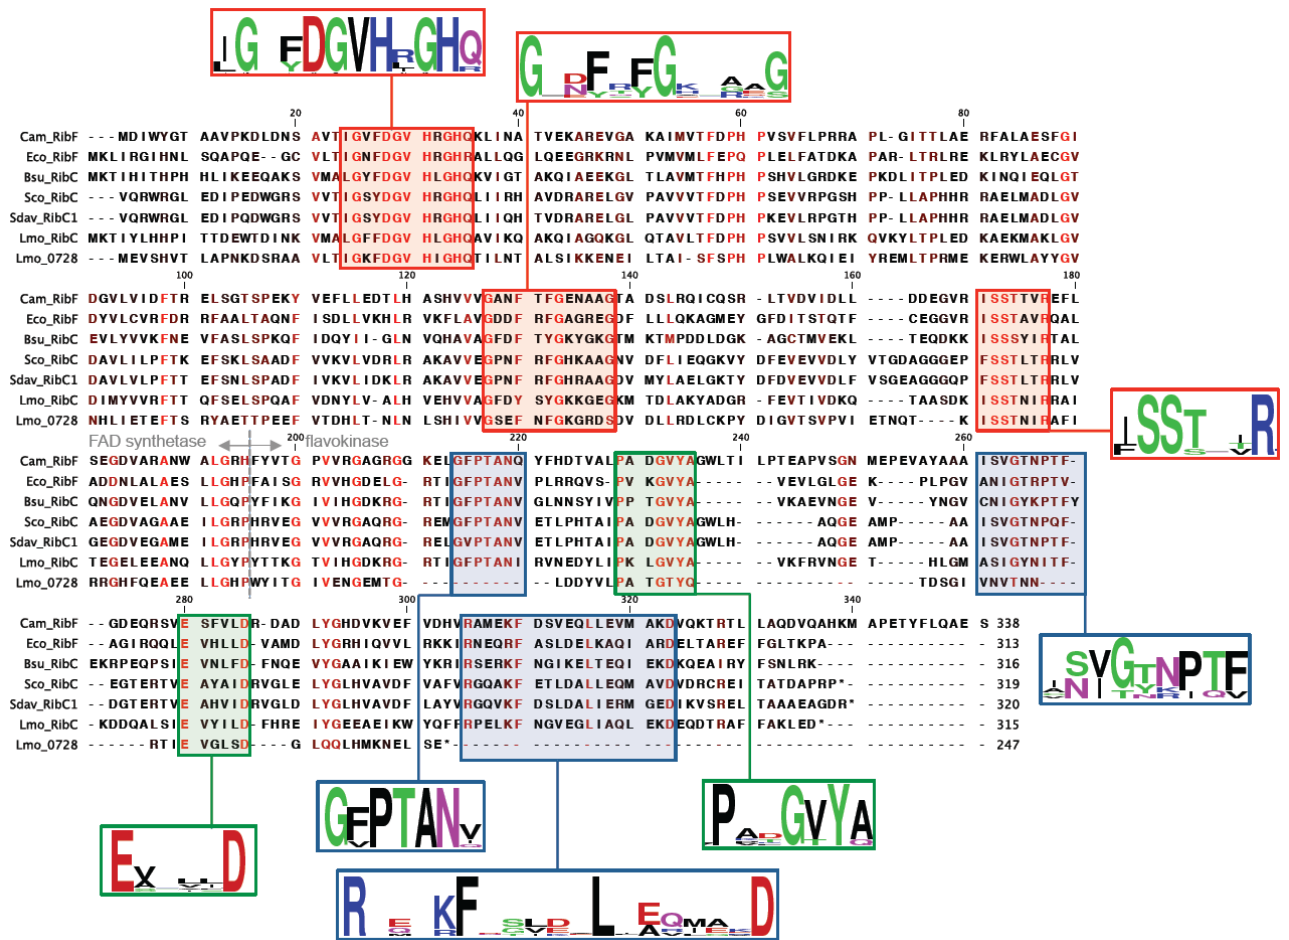

119  
120
